# Supplementary material
Source: PubMed Central journal article supplement (PMC3644644)
Supplement: mmc1.pdf [file mmc1.pdf]

**Supplemental Data**

**MASTOR: Mixed-Model Association Mapping  
of Quantitative Traits in Samples  
with Related Individuals**

Johanna Jakobsdottir and Mary Sara McPeck

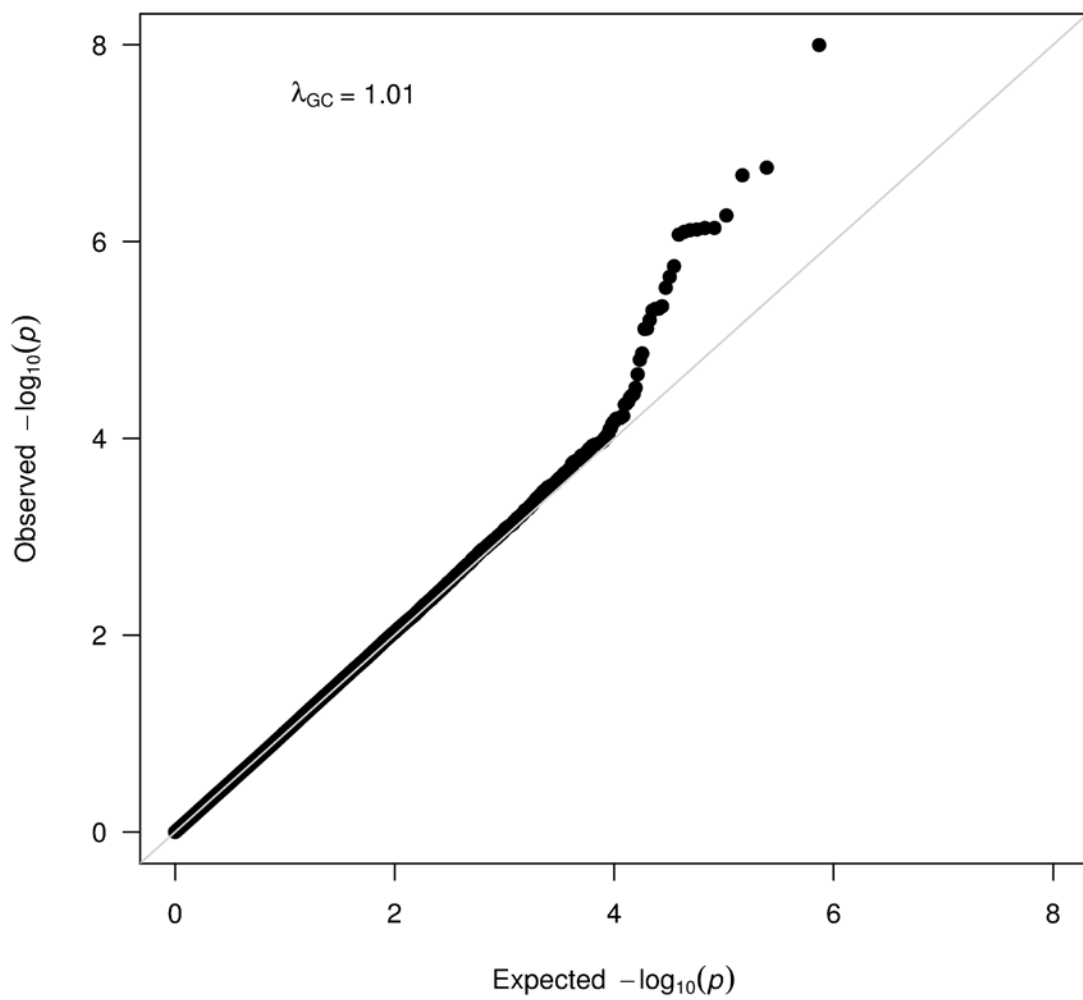

Figure S1: Q-Q plot for MASTOR analysis of HDL-C in Framingham Heart Study
